# Supplementary material for: Career services at HEI’s: what are they offering?
Source: Frontiers journal article supplement (doi:10.3389/feduc.2024.1410628), 2024-12-03
Supplement: Table_1.docx [file Table_1.docx]

## Career Services at HEI’s: What are they offering?

Terciary Education

Veronika Khurumova & Joana Carneiro Pinto

Catholic University of Portugal

[joanacarneiropinto@ucp.pt](mailto:joanacarneiropinto@ucp.pt)

| **HEI** | **Career Office** | **Individual Career Counselling** | **Other services** | **Online Career Counselling** | **Information in English** | **Website** |
| --- | --- | --- | --- | --- | --- | --- |
| Atlantic University Business School | Y | N | - Internship - Entrepreneurship | N | N | <https://www.abs.pt/estudantes/gia/> |
| Autonoma University | Y | n/a | - Job portal - Internship | N | Y | <https://en.autonoma.pt/servicos/gabinete-de-insercao-profissional/> |
| ESAD | Y | n/a | - Internship - Workshops | N | Y | <https://esad.pt/pt/news/gabinete-de-empregabilidade> |
| Escola Superior Gallaecia | Y | n/a | - Internship - Workshops - Events - Entrepreneurship | N | Y | <https://esg.pt/estudantes/gabinete-de-apoio-ao-aluno/insercao-na-vida-ativa/> |
| ESECVP-AT | Y | n/a | n/a | N | N | <https://esecvpaltotamega.pt/pt/paginas/pagina.php?idpag=57> |
| School of Education Paula Frassinetti | Y | N | - Workshops - Entrepreneurship | N | N | <https://www.esepf.pt/saidas-profissionais/> |
| Higher School of Health University of Atlantica | Y | Y | - Internship - Entrepreneurship - Workshops | N | N | [https://careermanagement.uatlantica.pt](https://careermanagement.uatlantica.pt/) |
| ESTGV | Y | N | - Internship | N | N | <https://www.estgv.ipv.pt/estgv/?v=73> |
| Estoril Higher Institute for Tourism and Hotel Studies | Y | n/a | - Internship | N | Y | <http://www.eshte.pt/pt/servicos/servicos/gabapoio-profissional-e-empresarial> |
| Europeia University | Y | n/a | n/a | N | Y | <https://www.europeia.pt/en/employability/employability-office> |
| Higher Institute of Leiria | Y* | Y | n/a | N | N | <https://www.islaleiria.pt/gabinete-de-apoio-e-acompanhamento-ao-estudante/> |
| Institute of Education and Sciences | Y | Y | - Internship - Workshops | N | Y | <https://www.iseclisboa.pt/index.php/en/employment> |
| Institute of Information Sciences and Administration | Y | Y | - Internship | N | N | <https://iscia.edu.pt/giape-gabinete-de-integracao-academica-e-profissional-do-estudante/> |
| Instituto Politécnico de Gestão e Tecnologia | Y | Y | - Internship - Workshops - Events | N | N | <http://instituto.islagaia.pt:8080/bolsa/> |
| Instituto Superior de Lisboa e Vale do Tejo | Y | n/a | - Internship - Entrepreneurship - Workshops | N | N | <https://www.isce.pt/pt/vida-no-isce/servicos-de-apoio-ao-estudante/isce-vida-ativa> |
| Instituto Superior de Paços de Brandão | Y | n/a | n/a | N | N | <https://www.facebook.com/Gabinete-de-Inserção-Profissional-de-Paços-de-Brandão-1026212760865545> |
| Instituto Superior Politécnico Gaya | Y | n/a | n/a | N | Y | <https://www.ispgaya.pt/site/por/page/view/services> |
| IPAM | Y | Y | - Workshops - Job Portal - Internship - Events | Y* (job platform has career development info) | Y | <https://www.ipam.pt/lisboa/empregabilidade/employability-office> |
| ISAG | Y | Y | - Workshops - Internship - Events - Job Portal | N | Y | <https://www.isag.pt/isag/unidades_geral.visualizar?p_unidade=592> |
| ISCTE Business School | Y | Y | - Internship - Events - Workshops - Mentoring - Job portal | Y* (job platform has career development info) | Y | <https://ibs.iscte-iul.pt/contents/the-experience/1575/career-services> |
| ISCTE SSP | Y | Y | - Internship - Events - Workshops - Job portal | Y* (job platform has career development info) | Y | <https://www.iscte-iul.pt/conteudos/iscte/schools/school-of-sociology-and-public-policy/career-services/2160/students> |
| ISMT | Y | n/a | - Internship - Entrepreneurship | N | N | <https://ismt.pt/unidades-de-apoio/gabinetes/gabinete-de-empreendedorismo/> |
| ISPA | Y | n/a | Internship | N | Y | <https://en.ispa.pt/pagina/internship-and-career-center-office> |
| ISSSP | Y | n/a | - Internship - Workshops - Events - Entrepreneurship | N | N | <https://www.isssp.pt/isssp/unidades_geral.visualizar?p_unidade=4> |
| Institute of Advanced Technologies  (ISTEC) | Y | Y | - Internship - Entrepreneurship - Workshops - Events | N | N | <https://www.istec.pt/index.php/gabinete-de-apoio-ao-estudante-e-a-empregabilidade/> |
| ISVOUGA | Y | Y | n/a | N | N | <https://isvouga.pt/pt/estudantes/bolsa-emprego/> |
| Maia University | Y | n/a | - Internship | N | N | <https://www.ismai.pt/pt/unidades-de-apoio/gabinetes/GEIMT> |
| NOVA FCH | Y | n/a | - Internship - Events - Job portal | Y* (job platform has career development info) | Y | <https://www.fcsh.unl.pt/en/students-2/internships-and-volunteering/> |
| NOVA IMS | Y | N | - Internship - Events | N | Y | <https://www.novaims.unl.pt/gabinete-de-insercao-profissional-apoio-a-empregabilidade> |
| NOVA School of Business & Economics | Y | Y | - Internship - Events - Workshops - Mentoring | Y | Y | <https://www2.novasbe.unl.pt/en/programs/bachelors/management/careers-placement> |
| NOVA School of Law | Y | n/a | n/a | N | Y | <https://novalaw.unl.pt/contactos-e-localizacao/> |
| NOVA School of Science and Technology | n/a | n/a | - Internship - Events - Job portal | Y* (job platform has career development info) | N | <https://www.fct.unl.pt/en/node/23083> |
| Politecnico Leiria | Y | n/a | - Internship | N | Y | <https://www.ipleiria.pt/inovar/comunidade-e-parceiros/bolsa-de-emprego/> |
| Polytechnic Institute of Beja | Y | Y | - Internship - Job Portal | N | N | <https://www.ipbeja.pt/servicos/giva/Paginas/default.aspx> |
| Polytechnic Institute of Bragança | Y | Y | - Entrepreneurship - Internship - Job Portal | N | N | <http://portal3.ipb.pt/index.php/pt/ipb/quem-somos/servicos-centrais/gabinetes-tecnicos/gabinete-de-promocao-do-empreendedorismo> |
| Polytechnic Institute of Castelo Branco | Y | n/a | - Internship - Job Portal | N | N | <https://www.ipcb.pt/sa/portal-emprego> |
| Polytechnic Institute of Cavada and Ave | Y | n/a | - Internship - Workshops - Events | Y* (job platform has career development info) | N | <https://ipca.pt/ipca/unidades/upraxis/g3e/emprego/estagios/> |
| Polytechnic Institute of Guarda | Y | Y | - Entrepreneurship - Internship - Volunteering - Job Portal | N | N | [http://www.gesp.ipg.pt](http://www.gesp.ipg.pt/) |
| Polytechnic Institute of Maia | Y | N | - Internship | N | N | <http://www.ipmaia.pt/pt/unidades-de-apoio/gabinetes/geimt> |
| Polytechnic Institute of Portalegre | Y | n/a | - Entrepreneurship - Internship - Workshops | Y  (MOOCs) | N | [http://gee.ipportalegre.pt](http://gee.ipportalegre.pt/) |
| Polytechnic Institute of Santarem | Y | N | - Entrepreneurship | N | N | <https://www.ipsantarem.pt/pt/unidades/empreendedorismo/> |
| Polytechnic Institute of Setubal | Y | n/a | - Entrepreneurship - Internship | N | N | <https://www.ips.pt/ips_si/web_base.gera_pagina?P_pagina=30556> |
| Polytechnic Institute of Viana do Castelo | Y | N | - Internship | N | N | <https://www.ipvc.pt/en/viver/emprego/> |
| Polytechnic of Coimbra | Y | Y | n/a | Y (e-learning enterpreneurship platform) | N | <https://www.ipc.pt/ipc/en/acao-social/saude-psicologia/> |
| Polytechnic of Leria | Y | Y | n/a | Y* (online 121) | Y | <https://www.ipleiria.pt/viver/servicos/apoio-psicologico/> |
| Polytechnic of Portalegre | Y | n/a | - Entrepreneurship | Yes (MOOCs) | N | <https://www.ipportalegre.pt/pt/empreendedorismo/empreendedorismo-e-ensino/> |
| Polytechnic of Porto | Y | Y | - Internship - Workshops - Events - Entrepreneurship | N | Y | <https://www.ipp.pt/education/student-support-services/academic-and-professional-integration-office/employability-and-career-management/employability-and-career-management> |
| Polytechnic of Viseu | Y | n/a | n/a | N | N | <http://siva.ipv.pt/?opt=MTE4LjYxLjUxLjQ5Lg==> |
| UCP FCH | Y | Y | - Internship - Events - Workshops - Mentoring - Job portal | N | Y | <https://fch.lisboa.ucp.pt/sobre-fch/servicos/gabinete-de-carreiras/careers-office> |
| UCP Lisbon School of Business & Economics | Y | Y | - Internship - Events - Workshops - Job portal | Y* (job platform has career development info) | Y | https://www.clsbe.lisboa.ucp.pt/pt-pt/atuais-alunos/careers-talent-office |
| UCP Porto | Y | Y | - Internship - Events - Workshops - Job portal | N | Y | [https://www.ee.porto.ucp.pt](https://www.ee.porto.ucp.pt/) |
| UCP Porto Business School | Y | N | - Internship - Events - Job portal - Pre-University Teen Academy | Y* (job platform has career development info) | Y | <https://catolicabs-porto.jobteaser.com/pt/users/sign_in?back_to_after_login=%2F> |
| UFP | Y | n/a | n/a | N | Y | <http://international.ufp.pt/campus-life/services-facilities/> |
| UL FDUL | Y | n/a | - Traineeship - Workshops | N | Y | <https://www.fd.ulisboa.pt/students/student-support-centre/careers-office/> |
| UL School of Economics and Management | Y | Y | - Internship - Workshops - Job platform - Events | N | Y | <https://iseg.ulisboa.pt/aquila/research/cmx/students/job-offers-&-internships?locale=en> |
| UL School of Science | Y | n/a | - Internship - Volunteering - Events | N | Y |  |
| University Lusiada Lisbon | Y | n/a | n/a | N | N | <https://www.lis.ulusiada.pt/pt-pt/in%C3%ADcio/informaçõesúteis.aspx> |
| University Lusiada Porto | Y | n/a | - Job portal - Internship | N | N | <http://www.por.ulusiada.pt/exterior/sp/index.html> |
| University Lusofona Lisbon | Y | Y | - Job portal - Internship - Workshops - Events | Y (workshops) | N | [http://eva.ulusofona.pt](http://eva.ulusofona.pt/) |
| University Lusofona Porto | Y | n/a | n/a | N | Y | <https://www.ulp.pt/en/international-office> |
| University of Açores | Y | Y | - Workshops - Job portal - Internship | Y* (webinars) | Y | <https://uac.pt/pt-pt/career-lab> |
| University of Aveiro | Y | Y | - Events - Job portal - Internship - Workshops | Y* (job platform has career development info) | Y | <https://www.ua.pt/en/professional-integration> |
| University of Beira Interior | Y | Y | - Events - Job portal - Internship - Workshops - Traineeship | N | Y | <https://www.ubi.pt/en/page/gisp_en> |
| University of Coimbra | Y | Y | - Events - Job portal - Internship - Workshops | Y* (job platform has career development info) | Y | <https://ucoimbra.jobteaser.com/pt/users/sign_in?back_to_after_login=%2F> |
| University of Evora | Y | n/a | - Job portal - Workshops - Traineeship | N | Y | <https://www.uevora.pt/en/Innovation/Employability> |
| University of Madeira | Y | n/a | - Job portal - Internship | N | N | [https://oe.uma.pt](https://oe.uma.pt/) |
| University of Minho | Y | Y | - Internship - Workshops - Mentoring | N | Y | <https://www.eeg.uminho.pt/en/Interacao/gabinete%20de%20carreiras/Pages/default.aspx> |
| University of Porto | Y | n/a | - Job portal - Internship - Workshops | Y* (job platform has career development info) | Y | <https://uporto.jobteaser.com/en/users/sign_in?action=new&back_to_after_login=%2F%3F&controller=custom_devise%2Fsessions&i18n_locale=pt> |
| UTAD | Y | n/a | - Job portal - Internship - Workshops - Events - Volunteering | N | Y | <https://www.utad.pt/en/students/employability/> |
